# Supplementary material for: Effect of cations on condensation of a mesogenic amphiphilic molecule at the air–aqueous electrolyte interface
Source: Royal Society of Chemistry journal article supplement (doi:10.1039/c3cp53751j), 2013-12-03
Supplement: c3cp53751j.pdf [file c3cp53751j.pdf]

Electronic supplementary information

**Effect of cations on condensation of a mesogenic  
amphiphilic molecule at air-aqueous electrolyte interface**

Shilpa Harish T and P. Viswanath\*  
Centre for Soft Matter Research,  
Jalahalli, Bangalore,  
560 013, India.

---

\*Corresponding author. E-mail: viswanath@csmr.res.in

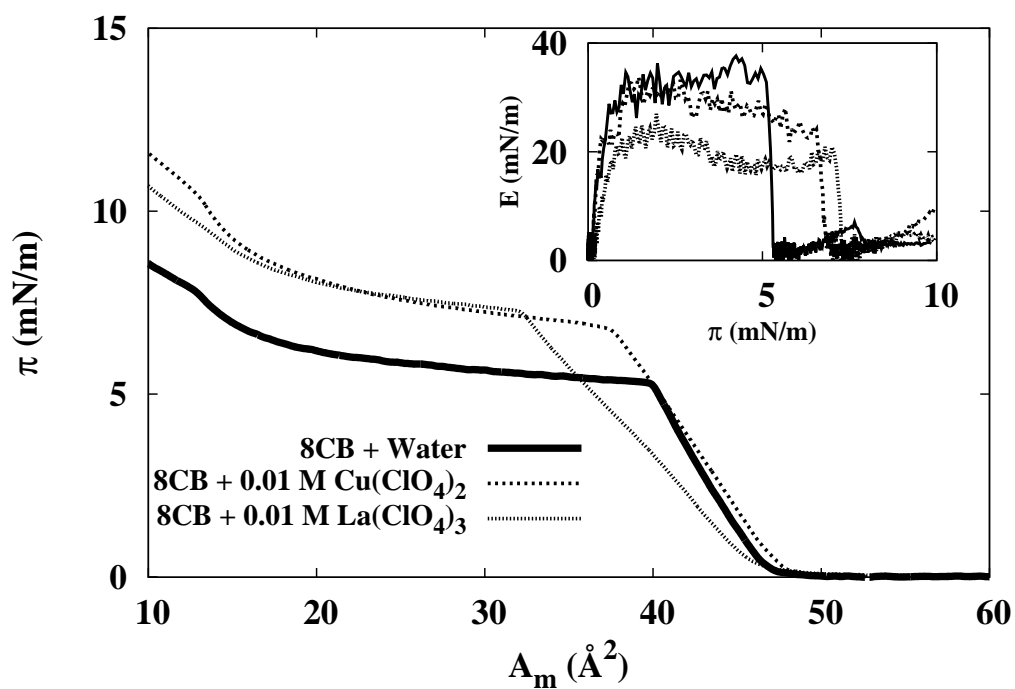

Figure S1: Surface pressure ( $\pi$ ) - area per molecule ( $A_m$ ) isotherm of 8CB monolayer for ion-free and ion-enriched subphase at 298 K. Inset shows the corresponding compression elastic modulus ( $E$ ) with surface pressure ( $\pi$ ).

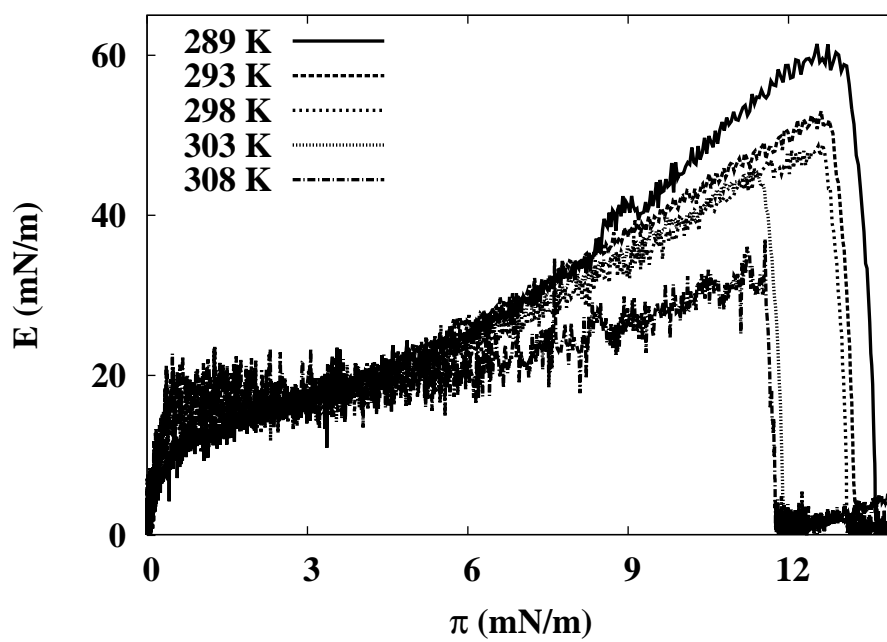

Figure S2: Variation of the elastic modulus,  $E$  with the surface pressure,  $\pi$  for 8CB monolayer with 0.1 M aluminum perchlorate solution as subphase at different temperatures.

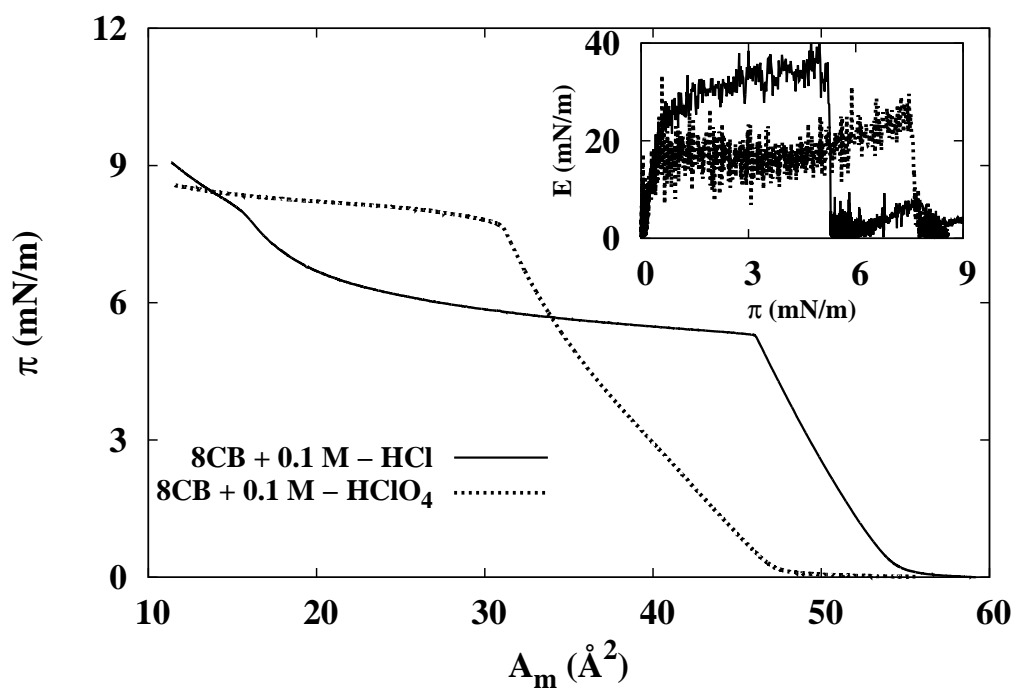

Figure S3: Surface pressure ( $\pi$ ) - area per molecule ( $A_m$ ) isotherm (298 K) of 8CB monolayer on aqueous subphase containing the acids at 0.1 M concentration. Inset shows the variation of compression elastic modulus ( $E$ ) with surface pressure ( $\pi$ ).
